# Supplementary material
Source: MDPI journal article supplement (https://www.mdpi.com/1424-8247/16/4/624)
Supplement: s1 [file s1]

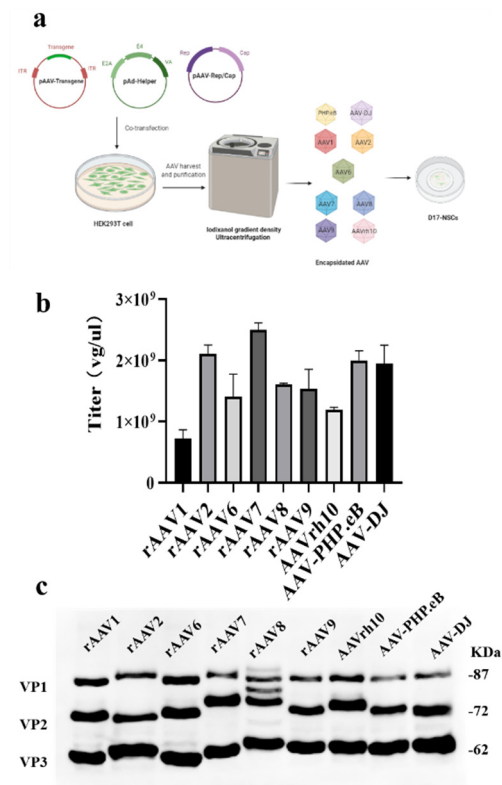

**Supplementary Figure S1. AAV titer and purity measurement.** **a**, Workflow of rAAV production and purification followed by K-NSC infection. **b**, Titers of rAAV vectors were measured via qPCR and quantified with GraphPad Prism software (V9). Data are expressed as the mean  $\pm$  SD (n=5). **c**, Western blot analysis of purified AAV with antibodies against the C-termini of the rAAV capsid proteins VP1, VP2, and VP3.

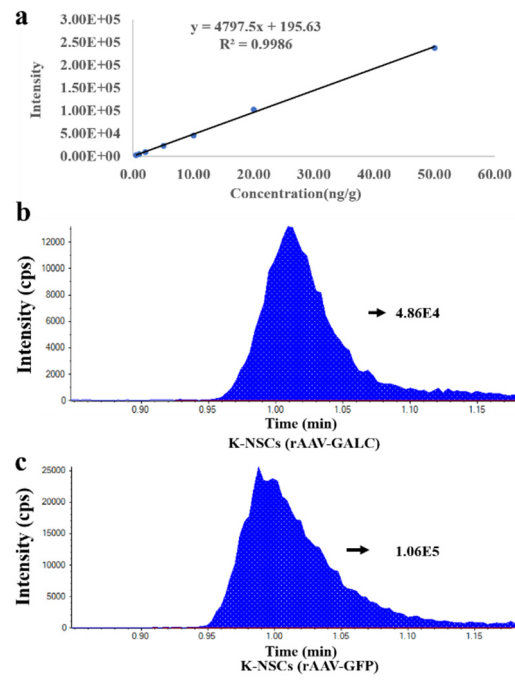

**Supplementary Figure S2.** Psychosine concentrations were determined by LC–MS/MS. **a**, Standard curve of the psychosine sample. **b**, The intensity of psychosine in infected K-NSCs was calculated with MultiQuant software (V3.0.3).

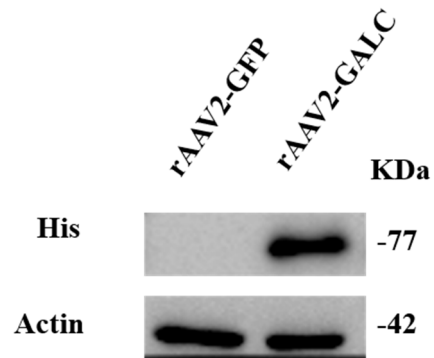

**Supplementary Figure S3.** Western blot analysis of the progeny of rAAV2-infected K-NSCs with antibodies against His (tagged with GALC) and Actin.
